# Supplementary material
Source: publisher figshare collection journal article supplement (https://future-science-group.figshare.com/ndownloader/files/28338426)
Supplement: Supplementary file 1 [file 28338426]

**Supplementary Table 4. Descriptive Summary of EQ-5D-3L at Baseline**

|  | **Patients Enrolled in EAMS Who Consented to EQ-5D-3L Completion and Returned a Baseline Questionnaire (N=72)** |
| --- | --- |
| **Mobility, n (%)** | **N=72** |
| No problems walking about | 50 (69.4) |
| Some problems walking about | 22 (30.6) |
| Confined to bed | 0 (0.0) |
| **Self-care, n (%)** | **N=72** |
| No problems with self-care | 66 (91.7) |
| Some problems washing or dressing self | 6 (8.3) |
| Unable to wash or dress self | 0 (0.0) |
| **Usual activities, n (%)** | **N=72** |
| No problems performing usual activities | 43 (59.7) |
| Some problems performing usual activities | 28 (38.9) |
| Unable to perform usual activities | 1 (1.4) |
| **Pain or discomfort, n (%)** | **N=72** |
| No pain or discomfort | 34 (47.2) |
| Moderate pain or discomfort | 37 (51.4) |
| Extreme pain or discomfort | 1 (1.4) |
| **Anxiety or depression, n (%)** | **N=72** |
| Not anxious or depressed | 51 (70.8) |
| Moderately anxious or depressed | 20 (27.8) |
| Extremely anxious or depressed | 1 (1.4) |
| **EQ-VAS score** | **N=69** |
| Mean (SD) | 72.9 (16.2) |
| **Health utility score** | **N=72** |
| Mean (SD) | 0.794 (0.177) |

Abbreviations: EAMS = Early Access to Medicines Scheme; EQ-5D-3L = EuroQoL Five Dimensions, Three Levels questionnaire; EQ-VAS = EuroQoL visual analogue scale; SD = standard deviation
